# Supplementary material for: Flow Cytometric Methods for the Detection of Intracellular Signaling Proteins and Transcription Factors Reveal Heterogeneity in Differentiating Human B Cell Subsets
Source: Preprints.org preprint supplement (doi:10.20944/preprints202012.0028.v1), 2020-12-02

# Supplementary Figure 1

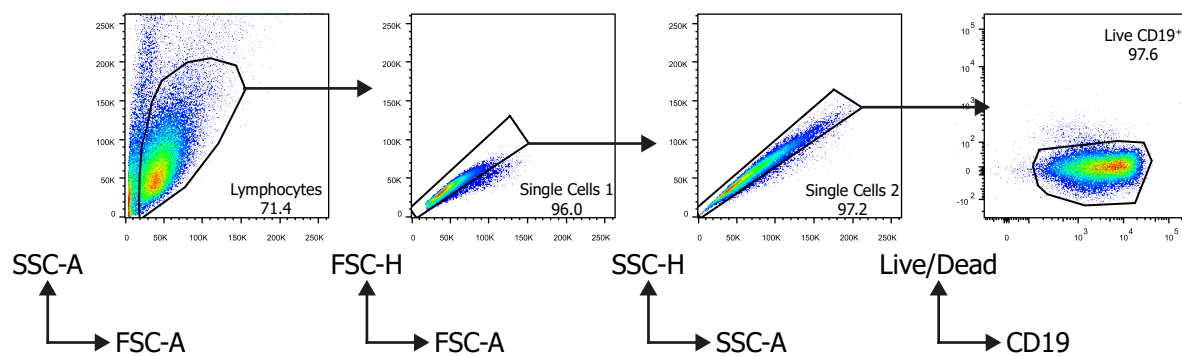

**A**

Stained Fixed Perm. Fixed Perm. Stained

CD19 APC

CD19 BV510

CD27 APC

CD27 PE

CD38 FITC

CD38 V450

FSC

**B**

anti-CD19 Clone SJ25C1 APC

anti-CD19 Clone SJ25C1 BV510

anti-CD27 Clone L128 APC

anti-CD27 Clone L128 PE

anti-CD38 Clone T16 FITC

anti-CD38 Clone HB7 V450

%CD19<sup>+</sup>

MFI APC

MFI BV510

MFI APC

MFI PE

MFI FITC

MFI V450

Stained Stained Fixed Perm. Fixed Perm. Stained

# Supplementary Figure 3

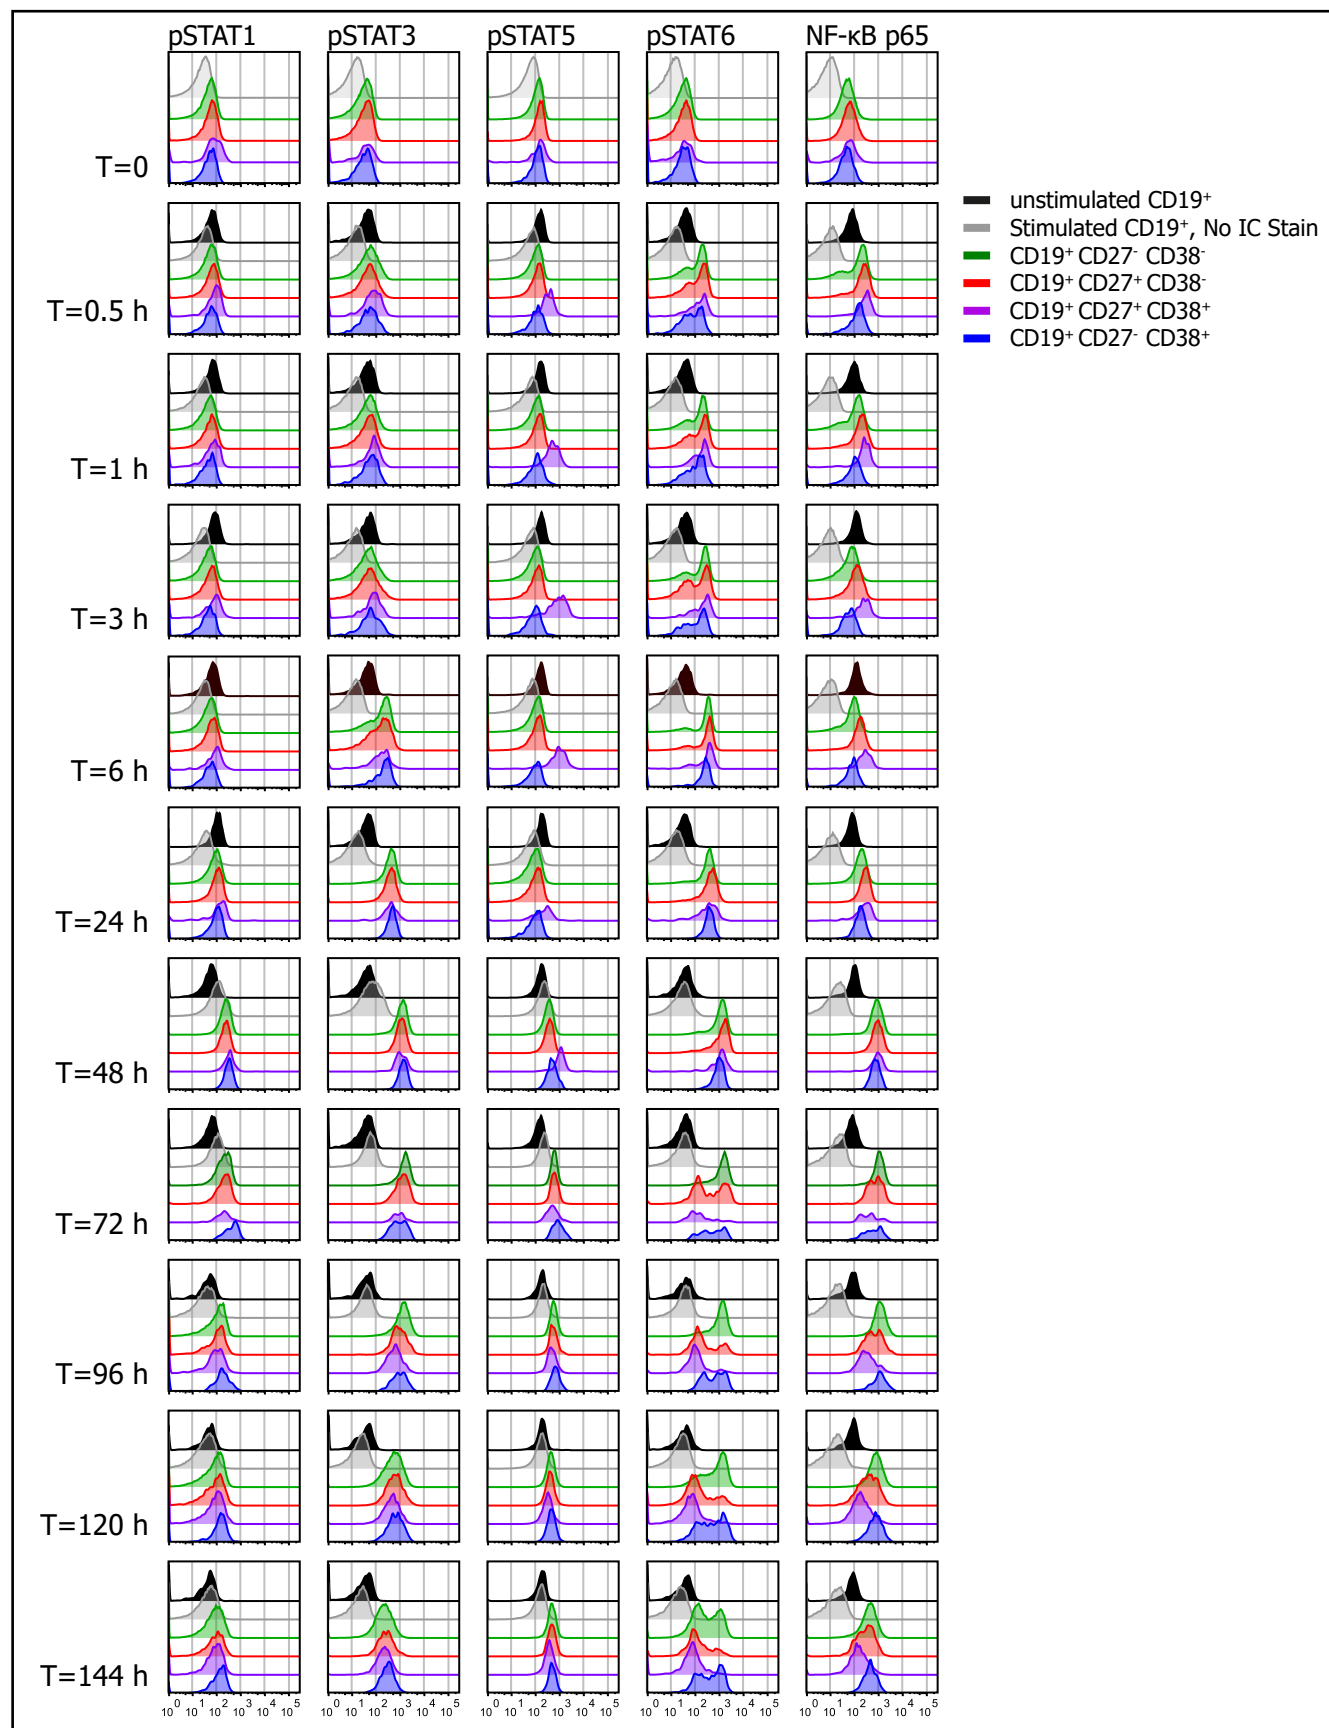

# Supplementary Figure 4

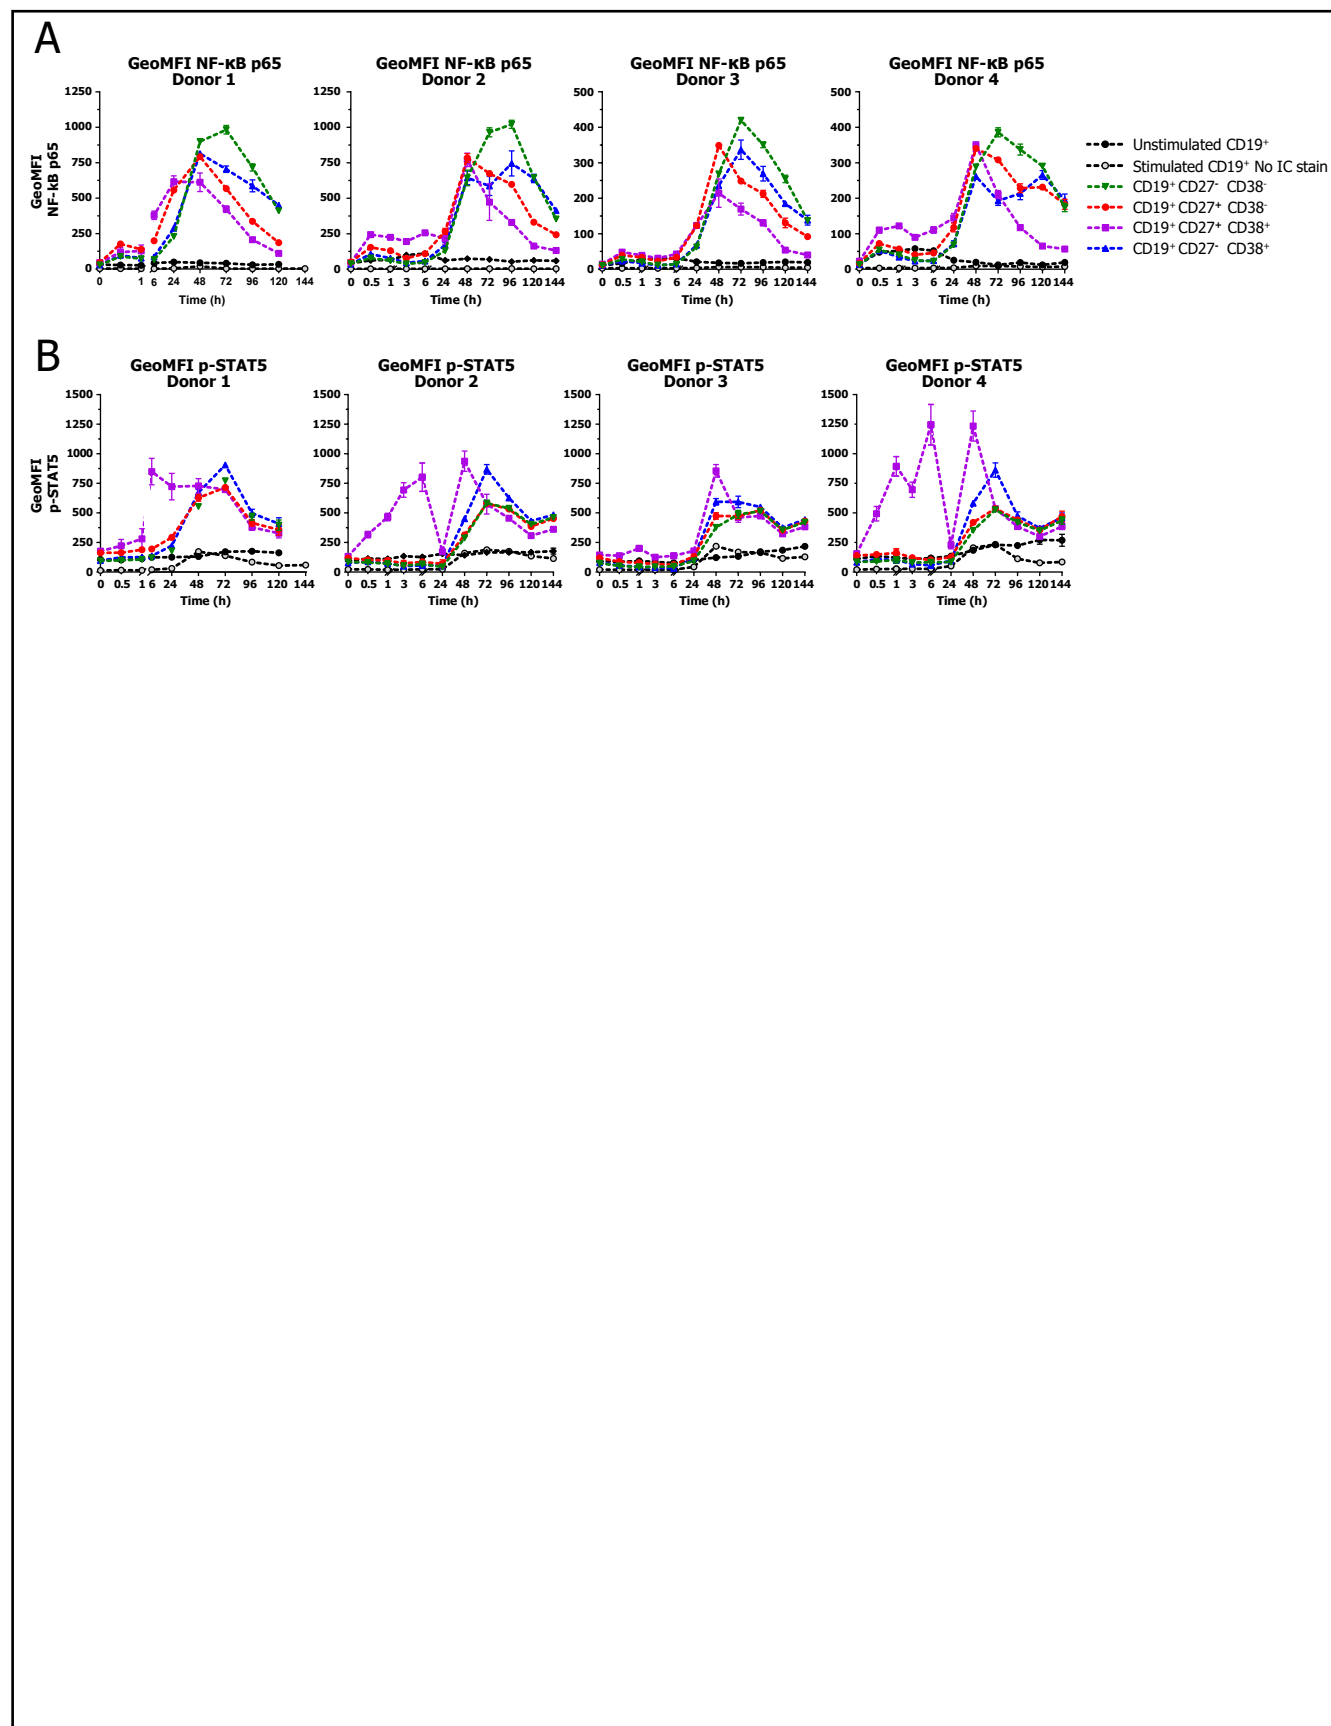

# Supplementary Figure 5

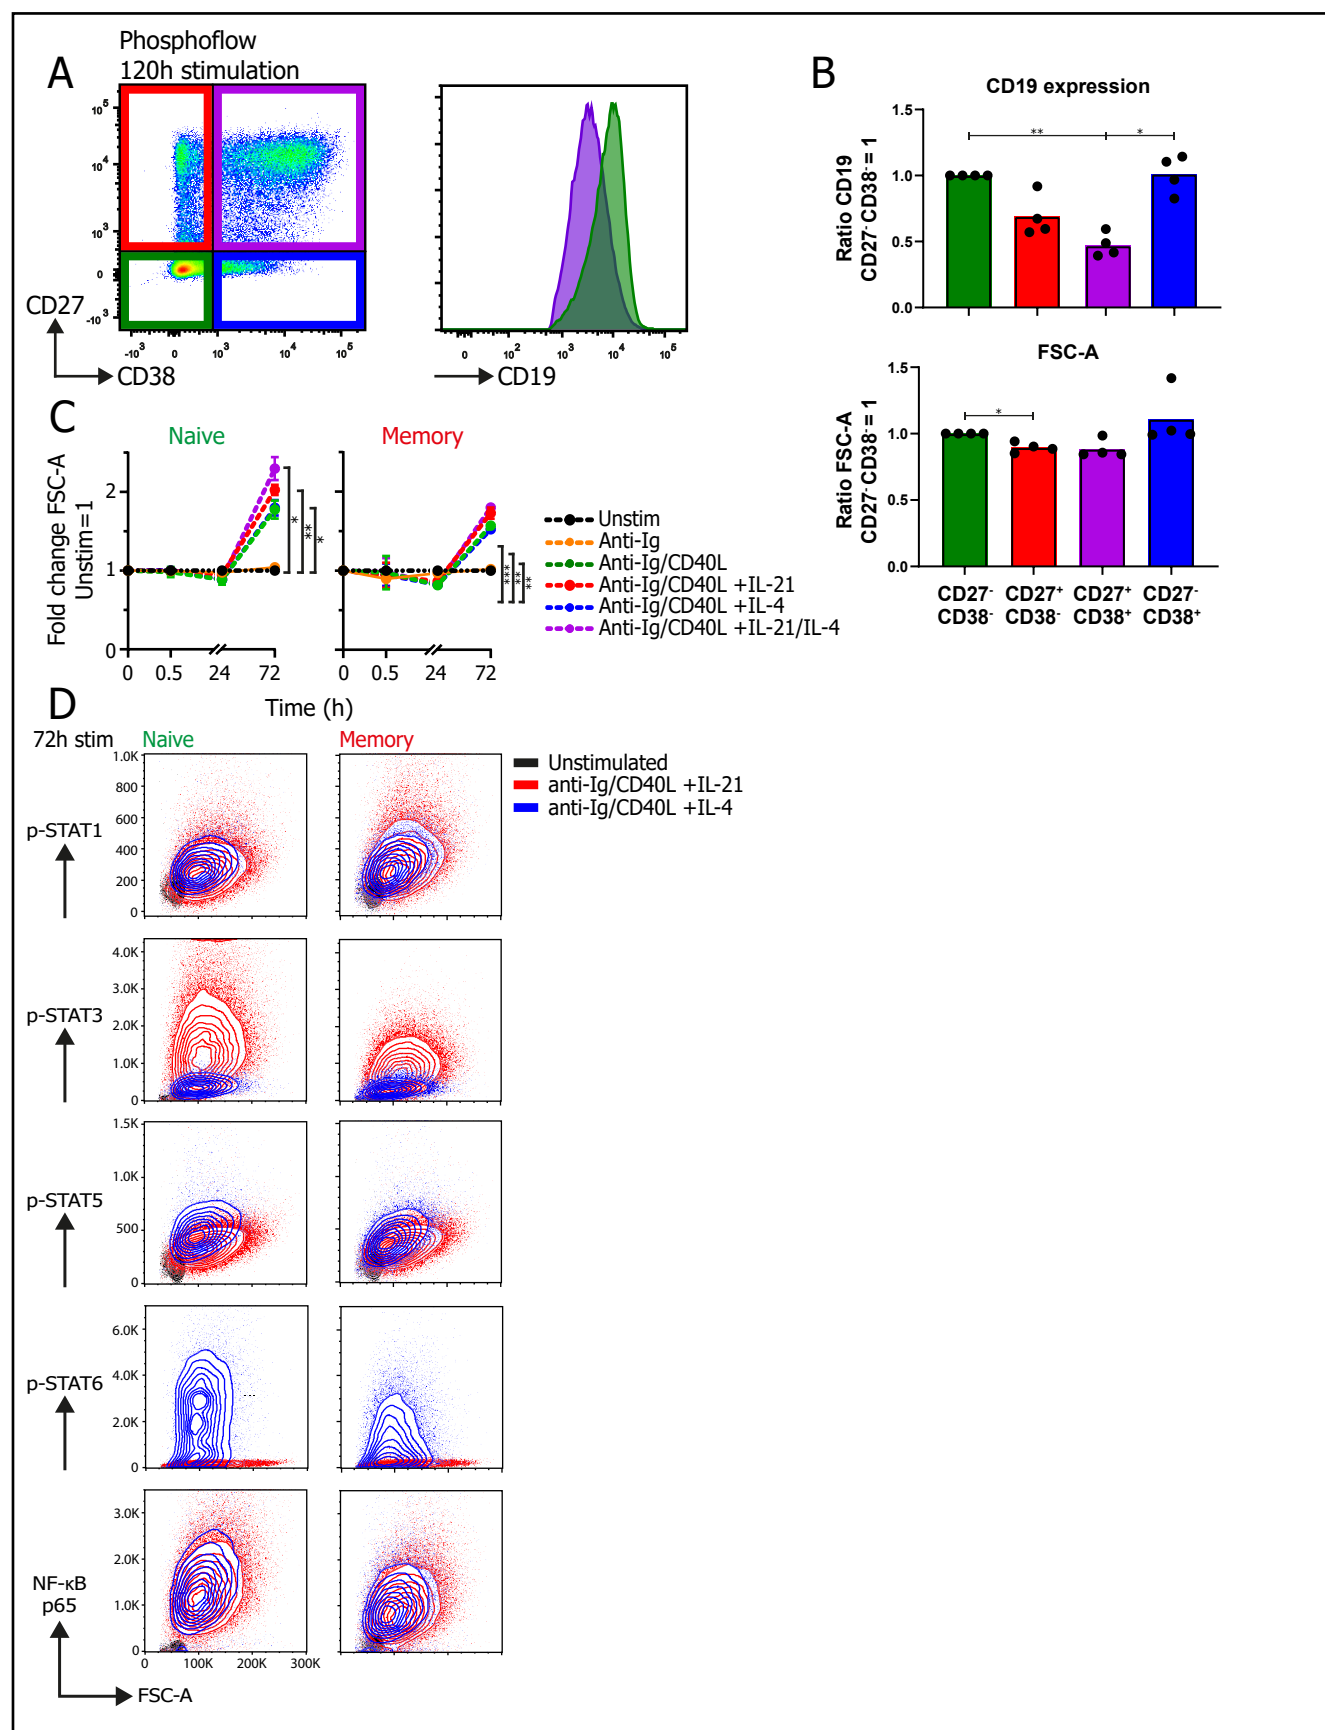

## Supplementary Figure 6

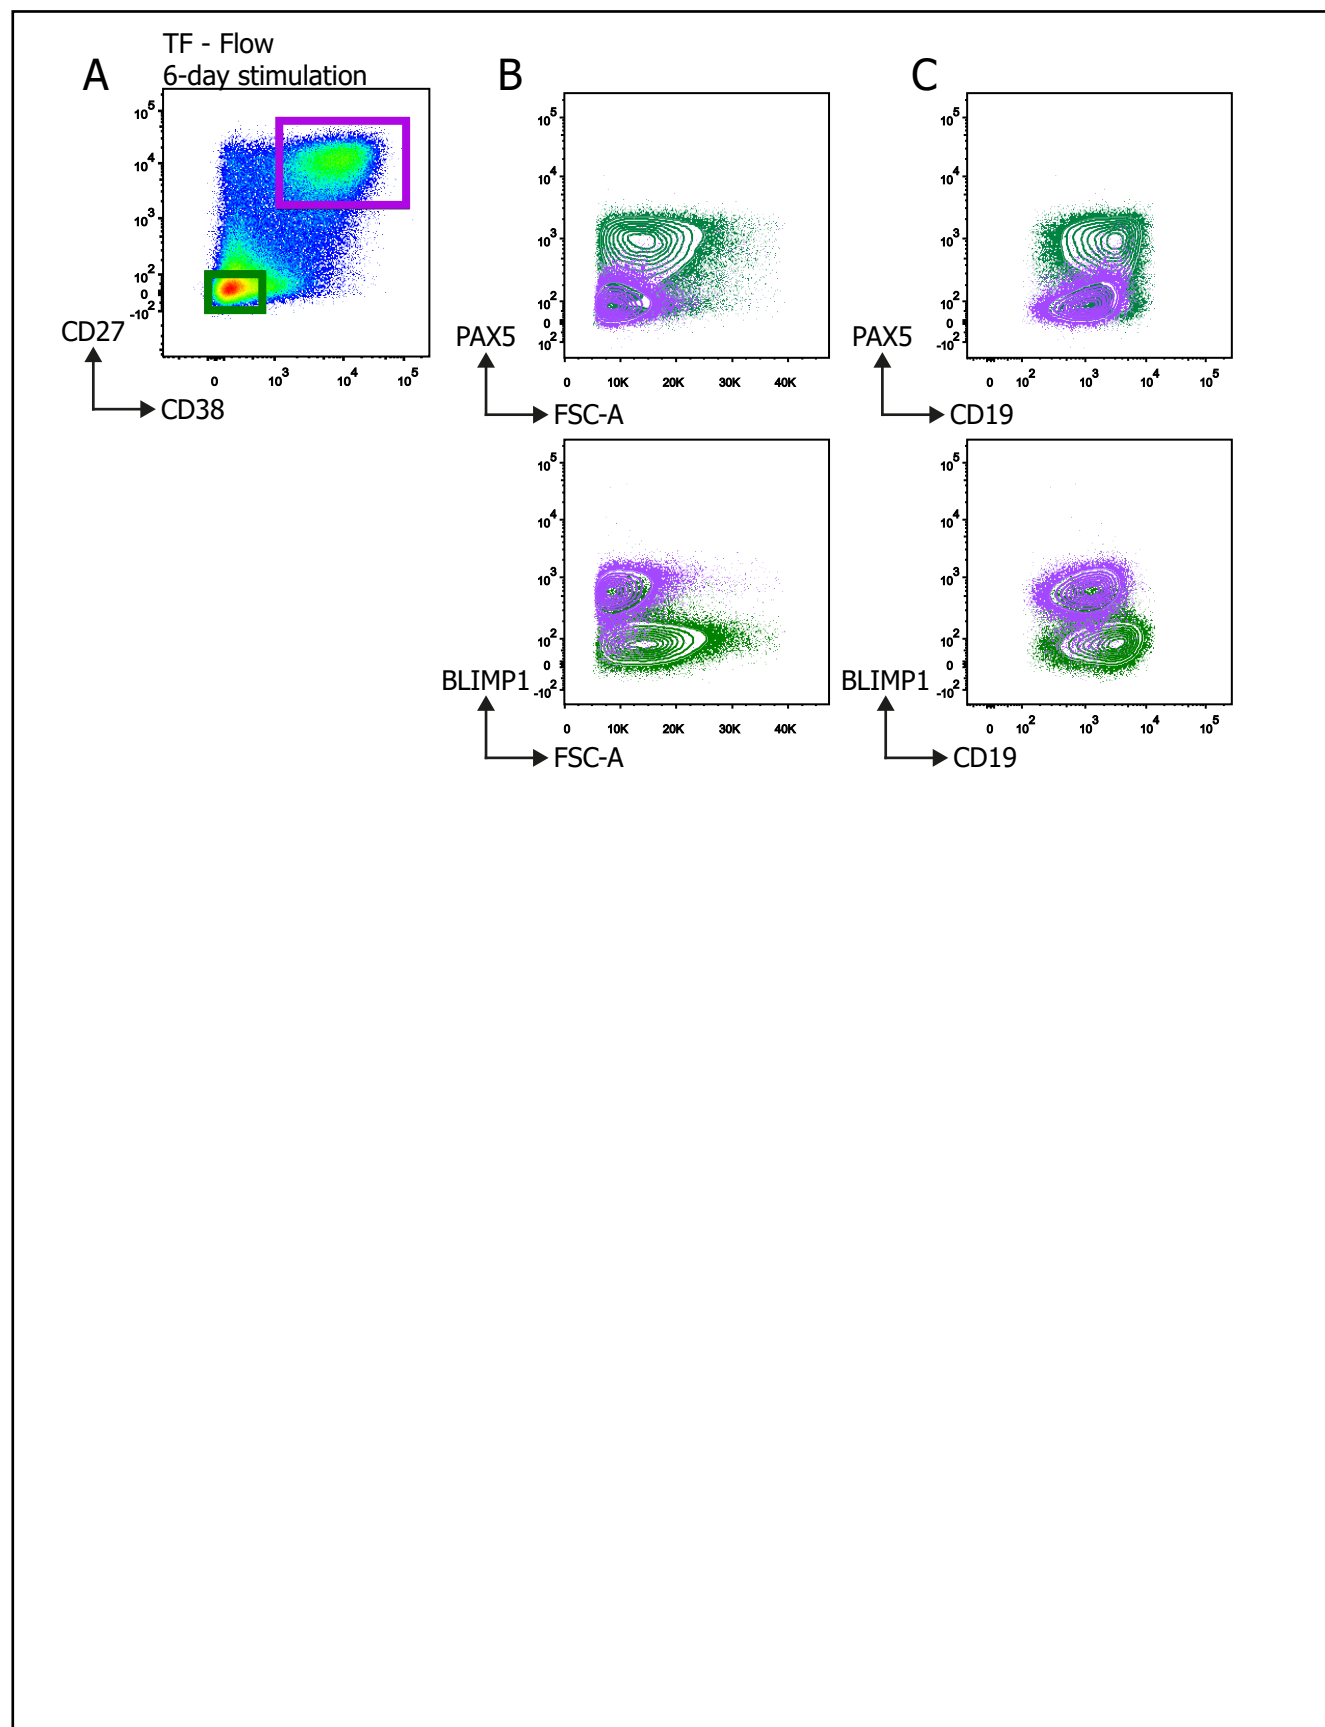

## Supplementary Figure 7

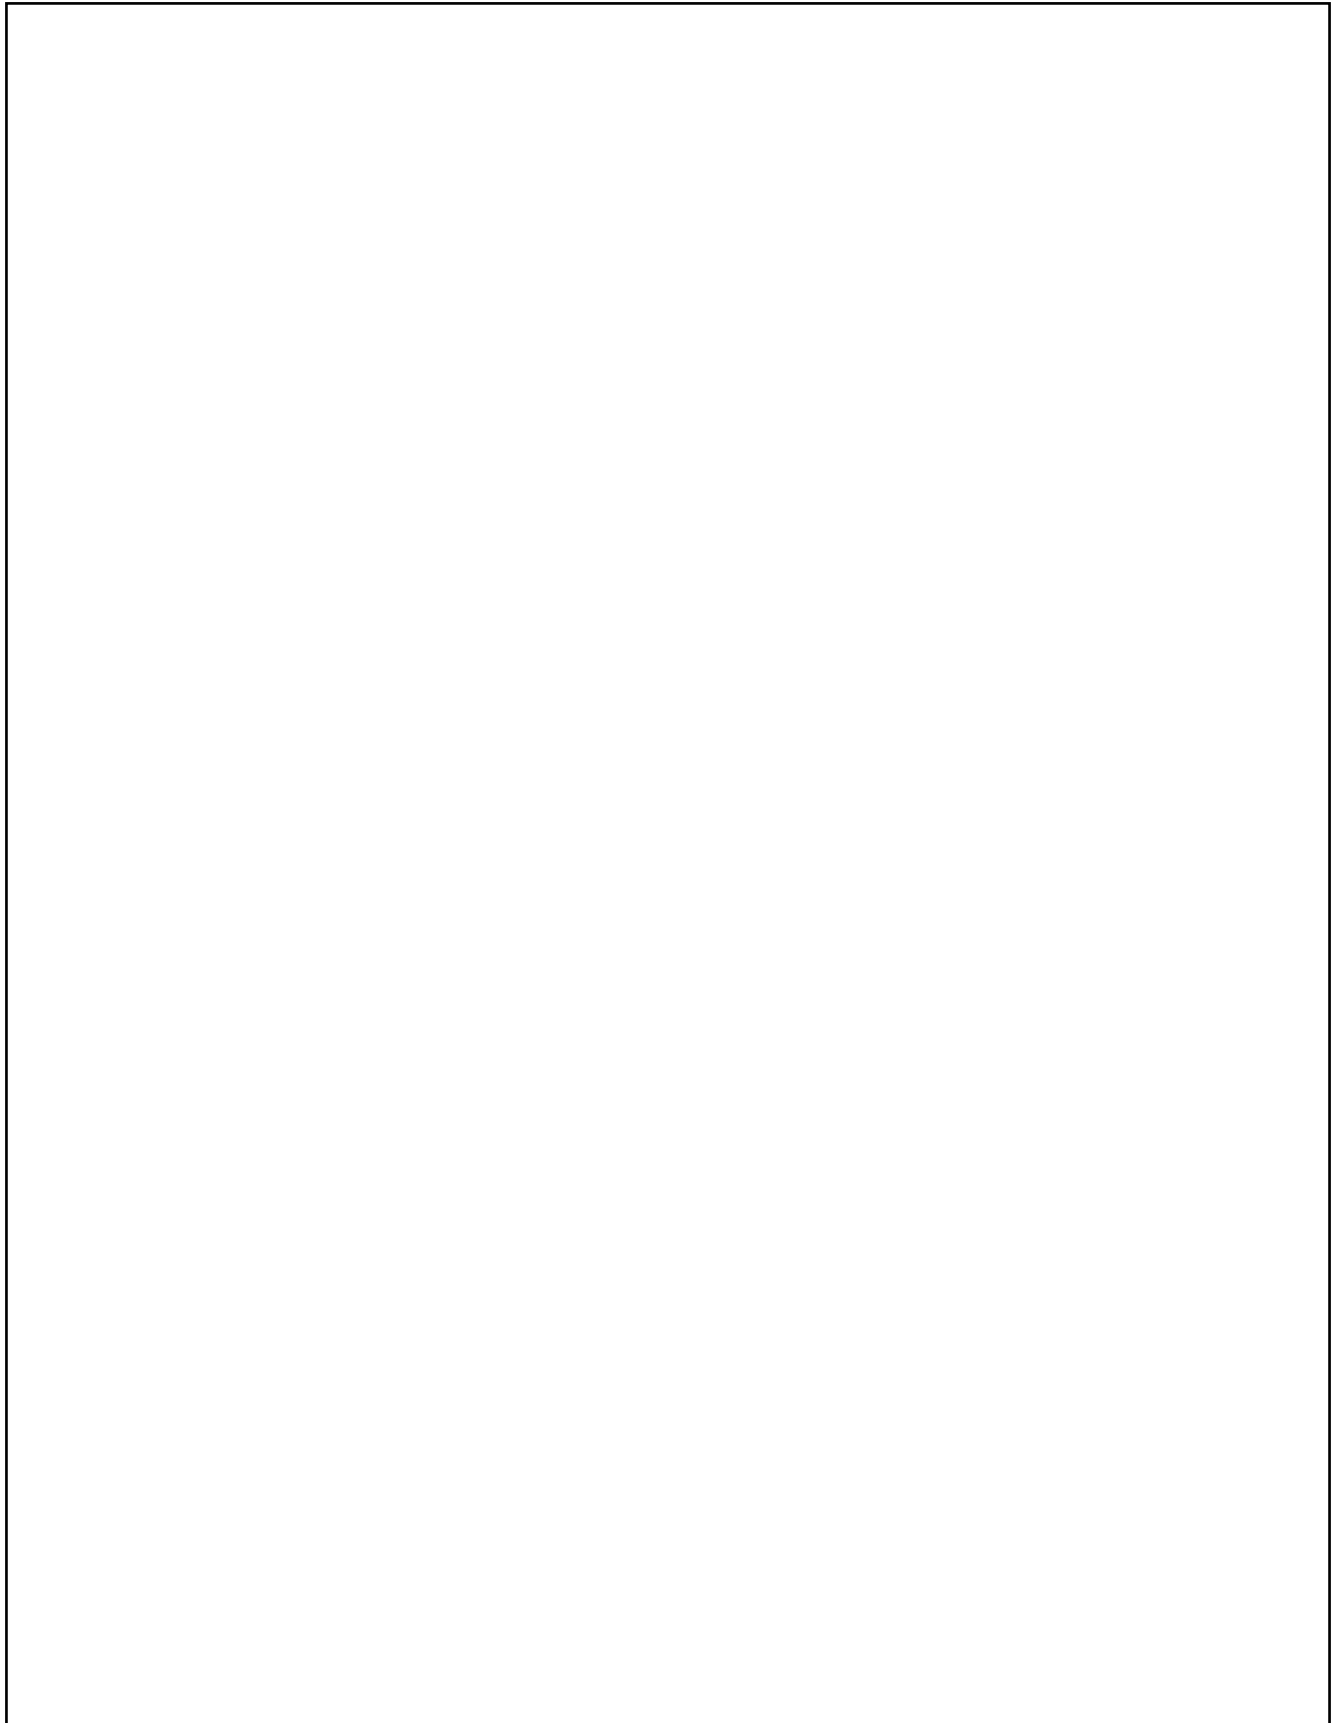

Supplement: Supplementary file 1 [file supplementary:Cells%20supplemental%20figures%20v3%20(final).pdf]
